# Supplementary material for: Island survivors: population genetic structure and demography of the critically endangered giant lizard of La Gomera, Gallotia bravoana
Source: PubMed Central journal article supplement (PMC4254221; doi:10.1186/s12863-014-0121-8), 2014-11-25
Supplement: 12863_2014_121_MOESM1_ESM.pdf [file 12863_2014_121_MOESM1_ESM.pdf]

**Fig. S1.** Distribution of alleles found for each locus in the wild and captive populations. The size of each dot is proportional to the allele frequency.

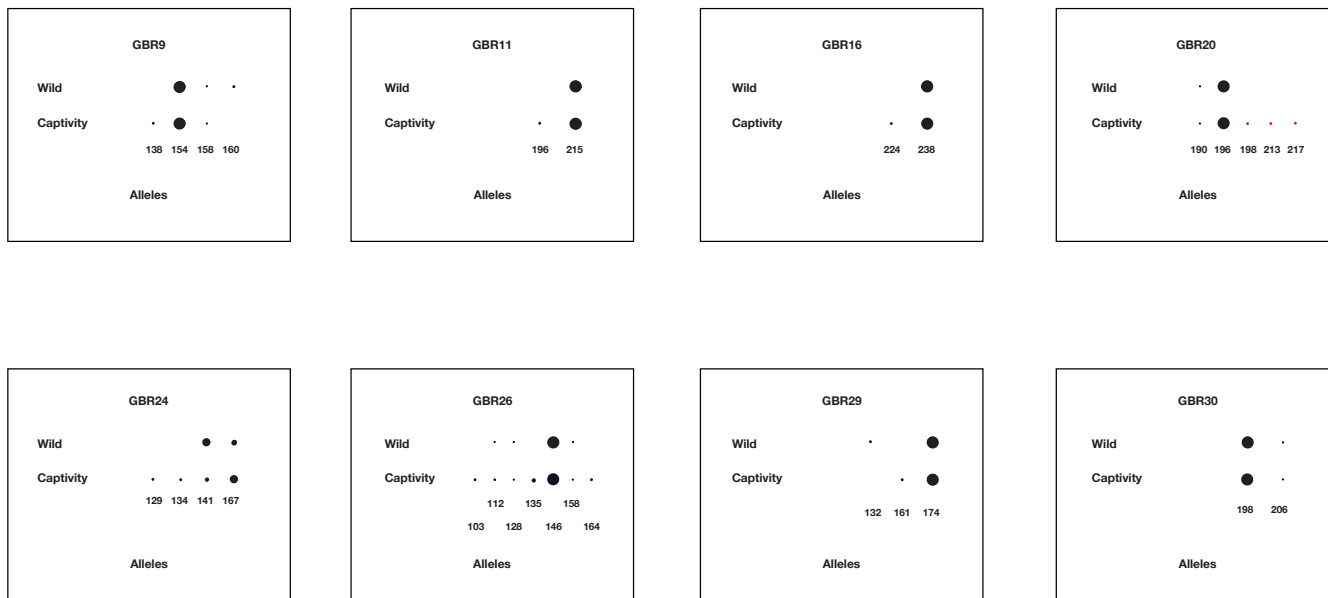

**Fig. S2.** Performance comparison of different relatedness ( $r$ ) estimators and null hypothesis of True Relatedness relationships (unrelated siblings, UR, were  $r = 0.0$ ; half-siblings, HS, were  $r = 0.25$ ; and full siblings, FS, were  $r = 0.5$ ): the Triadic Likelihood estimator (TrioML, [1]), the Queller estimator (QuellerGT, [2]), the Wang estimator (Wang, [3]), and the regression based method-of-moments estimator (LynchRd, [4]). Each bar indicates the mean relatedness and standard deviation (mean  $r \pm$  SD) per relatedness estimator. Significance levels are also indicated (\* $P < 0.05$ ; \*\* $P < 0.01$ ; \*\*\* $P < 0.001$ ).

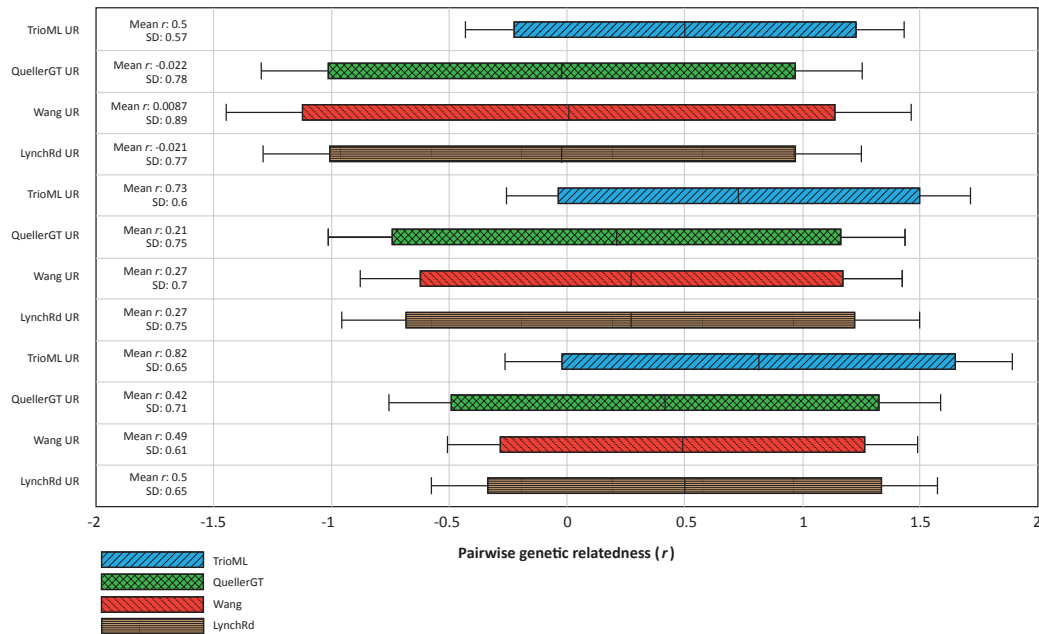

The performance of each estimator was obtained as the difference between the mean observed and expected  $r$  value in each True Relatedness kinship category (FS: where  $r = 0.5$ ; HS:  $r = 0.25$ ; UR:  $r = 0.0$ ). The sampling error was calculated as the standard deviation (SD) of the relatedness estimates for each dataset. Since we observed that the data for all groups deviate from a normal distribution (Shapiro-Wilks normality test,  $P < 0.00$ ), we ran the Wilcoxon matched test (analogous to the paired  $t$ -test) instead.

Our results indicated that for our datasets the means of most of the relatedness estimates for the three kinship categories deviate significantly from expected relatedness values (i.e., in nine out of the 12 tests performed, Supplementary Fig. S3). The most affected was the TrioML estimator that showed the strongest significant

upward bias in all cases and an average bias across relationships of 0.51. The two estimators that showed the lower difference between observed and expected values were QuellerGT and Wang estimators (mean average bias across the three relationships was 0.072 and 0.169, respectively). However, the comparison of the SD variance between the estimates indicated that QuellerGT performed better, and was selected for further analysis.

Finally, when considering the different relationships analyzed, we observed that the population defined by a higher proportion of related individuals (FS, where  $r = 0.5$ ) performed better, which could be indicative of the true genetic relatedness of our study population.

1. Wang J: **Triadic IBD coefficients and applications to estimating pairwise relatedness.** *Genetics Research* 2007, **89**(3):135-153.
2. Queller DC, Goodnight KF: **Estimating relatedness using genetic-markers.** *Evolution* 1989, **43**(2):258-275.
3. Wang JL: **An estimator for pairwise relatedness using molecular markers.** *Genetics* 2002, **160**(3):1203-1215.
4. Lynch M, Ritland K: **Estimation of pairwise relatedness with molecular markers.** *Genetics* 1999, **152**(4):1753-1766.

**Supplementary Table S1.** Summary data for cross-species amplifications of 11 specific *Gallotia bravoana* microsatellites for all the related species within Gallotiinae. The number of individuals (*N*) analyzed are also included\*

| Locus | <i>G. intermedia</i><br>( <i>N</i> =8) | <i>G. simonyi</i><br>( <i>N</i> =8) | <i>G. caesaris</i><br>( <i>N</i> =8) | <i>G. atlantica</i><br>( <i>N</i> =8) | <i>G. stehlini</i> ( <i>N</i> =8) | <i>G. galloti</i><br>( <i>N</i> =8) | <i>P. algirus</i><br>( <i>N</i> =8) |
|-------|----------------------------------------|-------------------------------------|--------------------------------------|---------------------------------------|-----------------------------------|-------------------------------------|-------------------------------------|
| GBR5  | —                                      | + (2, 171-173)                      | —                                    | —                                     | ± (2; 157-171)                    | —                                   | —                                   |
| GBR9  | + (2; 138-140)                         | + (2; 149-156)                      | + (2; 138-140)                       | ± (3; 123-154)                        | + (7; 140-162)                    | + (3; 138-149)                      | + (6; 131-170)                      |
| GBR11 | + (4; 211-242)                         | + (4; 207-219)                      | + (6; 175-200)                       | + (5; 200-215)                        | + (7; 200-232)                    | + (4; 179-207)                      | + (1; 145)                          |
| GBR15 | —                                      | —                                   | —                                    | —                                     | —                                 | —                                   | —                                   |
| GBR16 | + (3; 230-242)                         | + (3; 219-242)                      | + (1; 224)                           | + (4; 207-227)                        | + (9; 228-259)                    | + (1; 224)                          | + (1; 225)                          |
| GBR20 | + (4; 185-196)                         | + (4; 185-194)                      | + (8; 181-224)                       | + (4; 171-187)                        | + (6; 167-191)                    | + (5; 191-210)                      | + (3; 194-201)                      |
| GBR24 | + (5; 147-159)                         | + (1; 145)                          | + (8; 129-163)                       | ± (1; 153)                            | ± (3; 143-153)                    | + (3; 145-171)                      | ± (1; 201)                          |
| GBR26 | —                                      | —                                   | —                                    | —                                     | —                                 | —                                   | —                                   |
| GBR28 | —                                      | —                                   | —                                    | —                                     | —                                 | —                                   | —                                   |
| GBR29 | —                                      | —                                   | —                                    | —                                     | —                                 | —                                   | ± (2; 194-196)                      |
| GBR30 | + (3; 170-200)                         | + (1; 198)                          | + (2; 198-206)                       | + (4; 186-194)                        | + (1; 186)                        | + (4; 196-222)                      | + (1; 225)                          |

\* The number of alleles and the allele range are presented in parentheses; + allele amplification success; ± low intensity allele amplification; - no allele amplification.

**Table S2.** Samples included in the study. The studbook identification number, the origin of sampling, date of sample collection, and the source for DNA extraction are also included.

| Studbook ID | Origin of sampling | Date of sampling | DNA source |
|-------------|--------------------|------------------|------------|
| *GBR18      | Vivarium           | 2001             | Tissue     |
| GBR19       | Vivarium           | 2003             | Tissue     |
| *GBR32      | Vivarium           | 2001             | Tissue     |
| GBR33       | Vivarium           | 2001             | Tissue     |
| GBR35       | Vivarium           | 2002             | Blood      |
| GBR64       | Vivarium           | 2002             | Tissue     |
| GBR65       | Vivarium           | 2002             | Tissue     |
| GBR66       | Vivarium           | 2002             | Tissue     |
| GBR67       | Vivarium           | 2003             | Tissue     |
| GBR68       | Vivarium           | 2003             | Tissue     |
| GBR69       | Vivarium           | 2003             | Tissue     |
| GBR70       | Vivarium           | 2003             | Tissue     |
| GBR71       | Vivarium           | 2003             | Tissue     |
| GBR72       | Vivarium           | 2003             | Tissue     |
| GBR73       | Vivarium           | 2003             | Tissue     |
| GBR74       | Vivarium           | 2003             | Tissue     |
| GBR75       | Vivarium           | 2003             | Tissue     |
| GBR76       | Vivarium           | 2003             | Tissue     |
| GBR77       | Vivarium           | 2004             | Tissue     |
| GBR78       | Vivarium           | 2004             | Tissue     |
| GBR79       | Vivarium           | 2004             | Tissue     |
| GBR80       | Vivarium           | 2002             | Tissue     |
| GBR81       | Vivarium           | 2005             | Tissue     |
| GBR82       | Vivarium           | 2005             | Tissue     |
| GBR83       | Vivarium           | 2005             | Tissue     |
| GBR84       | Vivarium           | 2005             | Tissue     |
| GBR85       | Vivarium           | 2005             | Tissue     |
| GBR86       | Vivarium           | 2005             | Tissue     |
| GBR87       | Vivarium           | 2005             | Tissue     |
| GBR88       | Vivarium           | 2005             | Tissue     |
| GBR89       | Vivarium           | 2005             | Tissue     |
| GBR90       | Vivarium           | 2005             | Tissue     |
| GBR91       | Vivarium           | 2005             | Tissue     |
| GBR92       | Vivarium           | 2005             | Tissue     |
| GBR93       | Vivarium           | 2005             | Tissue     |
| GBR94       | Vivarium           | 2005             | Tissue     |
| GBR95       | Vivarium           | 2005             | Tissue     |
| GBR96       | Vivarium           | 2005             | Tissue     |
| GBR97       | Vivarium           | 2005             | Tissue     |
| GBR98       | Vivarium           | 2005             | Tissue     |
| GBR99       | Vivarium           | 2005             | Tissue     |
| GBR100      | Vivarium           | 2005             | Tissue     |
| GBR1        | Veta Fuente        | 1999             | Tissue     |
| *GBR2       | Quiebracanillas    | 2000             | Blood      |
| GBR3        | Veta Fuente        | 2000             | Tissue     |
| GBR4        | La Mérica          | 2000             | Tissue     |
| GBR5        | Quiebracanillas    | 2000             | Blood      |
| GBR6        | Quiebracanillas    | 2000             | Blood      |
| GBR7        | Conejo             | 2000             | Blood      |
| *GBR8       | Conejo             | 2000             | Blood      |
| GBR9        | Conejo             | 2000             | Blood      |
| GBR10       | Conejo             | 2000             | Blood      |
| *GBR11      | Conejo             | 2000             | Blood      |
| GBR12       | Conejo             | 2001             | Blood      |
| GBR13       | Quiebracanillas    | 2001             | Blood      |
| GBR14       | Conejo             | 2001             | Blood      |
| GBR15       | Conejo             | 2001             | Blood      |
| *GBR16      | Quiebracanillas    | 2001             | Blood      |
| GBR17       | Veta Fuente        | 2001             | Tissue     |
| GBR20       | La Calera          | 2001             | Tissue     |
| GBR21       | Veta Fuente        | 2001             | Tissue     |
| *GBR22      | Quiebracanillas    | 2001             | Blood      |
| GBR23       | Conejo             | 2001             | Blood      |
| *GBR24      | Veta Fuente        | 2000             | Blood      |
| *GBR25      | Quiebracanillas    | 2001             | Blood      |
| *GBR26      | Quiebracanillas    | 2001             | Blood      |
| GBR27       | Quiebracanillas    | 2002             | Blood      |
| GBR28       | La Mérica          | 2002             | Tissue     |
| GBR29       | Cacas              | 2002             | Blood      |
| GBR30       | Veta Fuente        | 2002             | Blood      |
| GBR31       | Cacas              | 2002             | Blood      |
| GBR34       | Veta Fuente        | 2002             | Blood      |
| GBR36       | Veta Fuente        | 2002             | Blood      |
| GBR37       | Cacas              | 2002             | Blood      |
| GBR38       | Veta Fuente        | 2002             | Tissue     |
| GBR39       | Veta Fuente        | 2003             | Tissue     |
| GBR41       | Cacas              | 2003             | Tissue     |
| GBR42       | Conejo             | 2003             | Blood      |
| GBR43       | Conejo             | 2003             | Blood      |
| GBR44       | Conejo             | 2003             | Blood      |
| GBR45       | Quiebracanillas    | 2003             | Blood      |
| GBR46       | Conejo             | 2003             | Tissue     |
| GBR47       | Conejo             | 2003             | Blood      |
| GBR48       | Conejo             | 2003             | Blood      |
| GBR49       | Conejo             | 2003             | Tissue     |
| *GBR50      | Conejo             | 2003             | Blood      |
| GBR51       | Conejo             | 2003             | Blood      |
| GBR52       | Conejo             | 2003             | Blood      |
| GBR53       | Conejo             | 2003             | Blood      |
| GBR54       | Conejo             | 2003             | Blood      |
| GBR55       | Conejo             | 2003             | Tissue     |
| GBR56       | La Mérica          | 2004             | Tissue     |
| GBR57       | La Mérica          | 2004             | Tissue     |
| GBR58       | La Mérica          | 2004             | Tissue     |
| GBR59       | La Mérica          | 2004             | Blood      |
| GBR60       | La Mérica          | 2004             | Tissue     |
| GBR61       | La Mérica          | 2004             | Blood      |
| GBR62       | La Mérica          | 2004             | Tissue     |
| GBR63       | La Mérica          | 2004             | Tissue     |

\* Founders (males and females) used for the breeding program.

**Table S3.** Log-normal priors (means/standard deviations, SD) and hyperpriors (means and variances for means and variances) used for MsVar analysis performed on *Gallotia bravoana* samples.  $N_0$  and  $N_1$  are current and ancestral effective population sizes, respectively;  $\Theta$  is the mutatio rate ( $\mu$ ) scaled in terms of  $N_0$  ( $2N_0\mu$ ).  $Ta$  is the number of generations since expansion/decline.

| Prior (mean/SD) | 100 years | 500 years | 2500 years | 10000 years |
|-----------------|-----------|-----------|------------|-------------|
| Log10 ( $N_0$ ) | 3/3       | 3/3       | 3/3        | 3/3         |
| Log10 ( $N_1$ ) | 3/3       | 3/3       | 3/3        | 3/3         |
| Log10 $\Theta$  | -3/1      | -3/1      | -3/1       | -3/1        |
| Log10 ( $Ta$ )  | 2/1       | 2.7/1     | 3.4/2      | 4/3         |

| Hyperpriors (mean/SD/hiperpriors of mean/SD)         |               |               |               |               |
|------------------------------------------------------|---------------|---------------|---------------|---------------|
| Log10 ( $\alpha N_0 \sigma N_0 \beta N_0 \tau N_0$ ) | 6/2/0/0.5     | 6/2/0/0.5     | 6/2/0/0.5     | 6/2/0/0.5     |
| Log10 ( $\alpha N_1 \sigma N_1 \beta N_1 \tau N_1$ ) | 6/2/0/0.5     | 6/2/0/0.5     | 6/2/0/0.5     | 6/2/0/0.5     |
| Log10 ( $\alpha \mu \sigma \mu \beta \mu \tau \mu$ ) | -3/0.25/0/0.5 | -3/0.25/0/0.5 | -3/0.25/0/0.5 | -3/0.25/0/0.5 |
| log10 ( $\alpha Ta \sigma Ta \beta Ta \tau Ta$ )     | 8/2/0/0.5     | 8/2/0/0.5     | 8/2/0/0.5     | 8/2/0/0.5     |
